# Supplementary figures and images for: A single microRNA miR-195 rescues the arrested B cell development induced by EBF1 deficiency
Source: eLife journal article supplement (doi:10.7554/elife.101510), 2024-10-07

Fig. 4 FSD

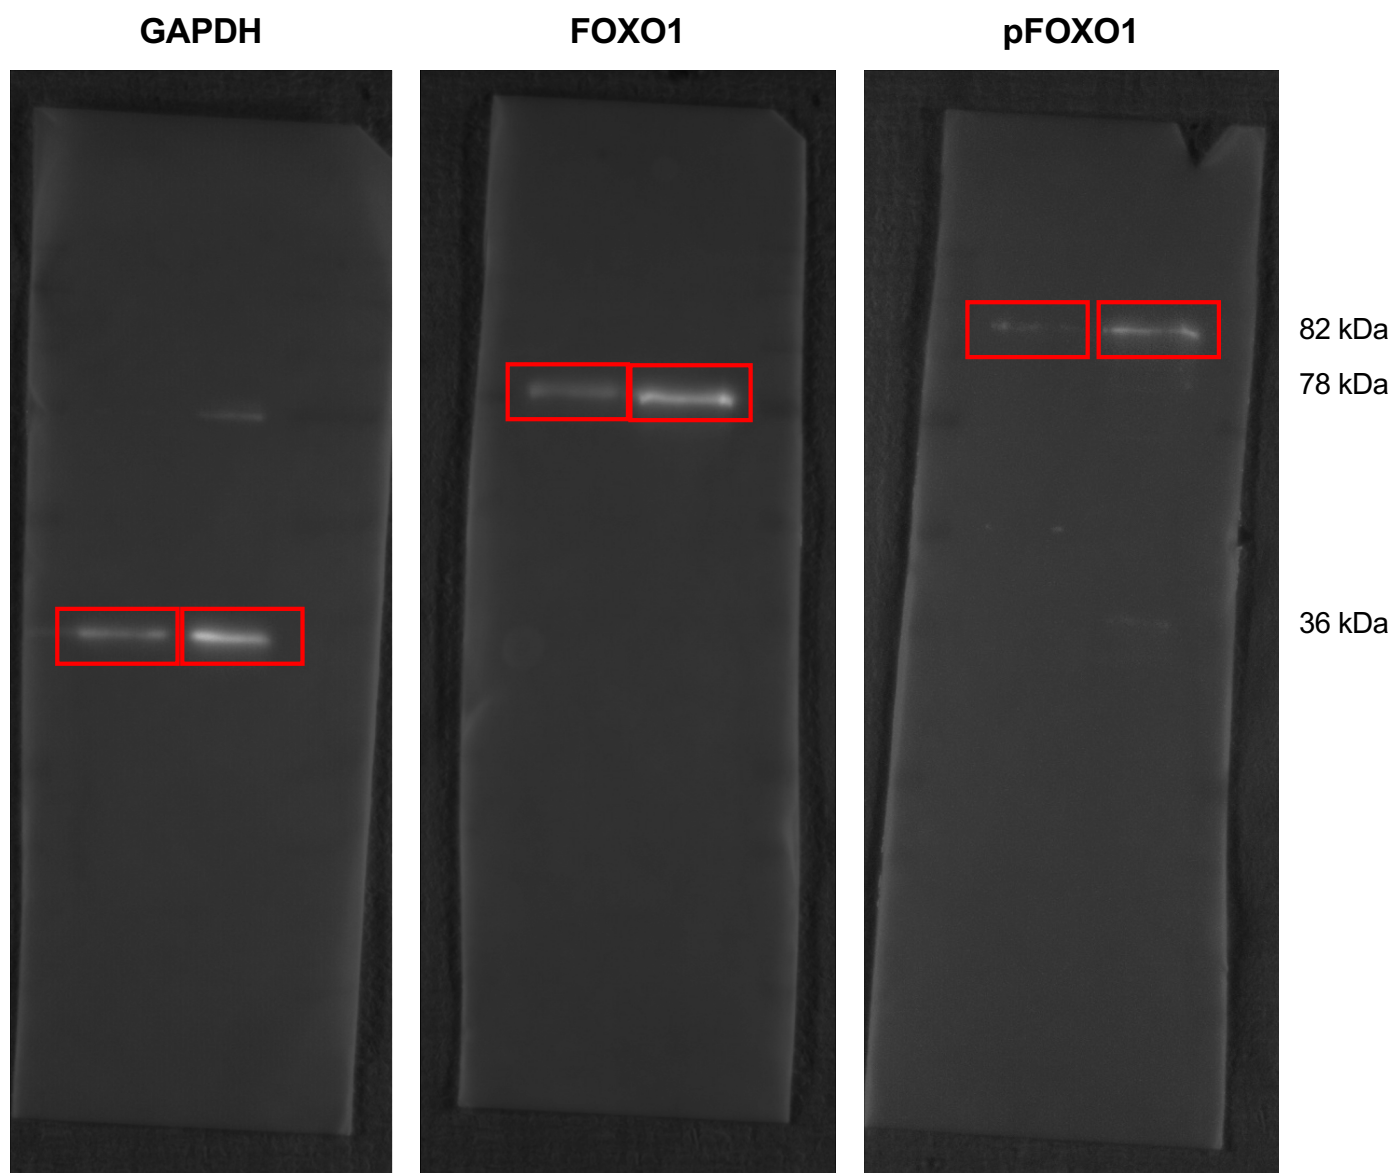

Supplement: fig4-data1 [file Figure4-source data 1.pdf › Figure4-source data 1/Figure4-source data 1.pdf]

Fig. 4-Fig. S1 FSD

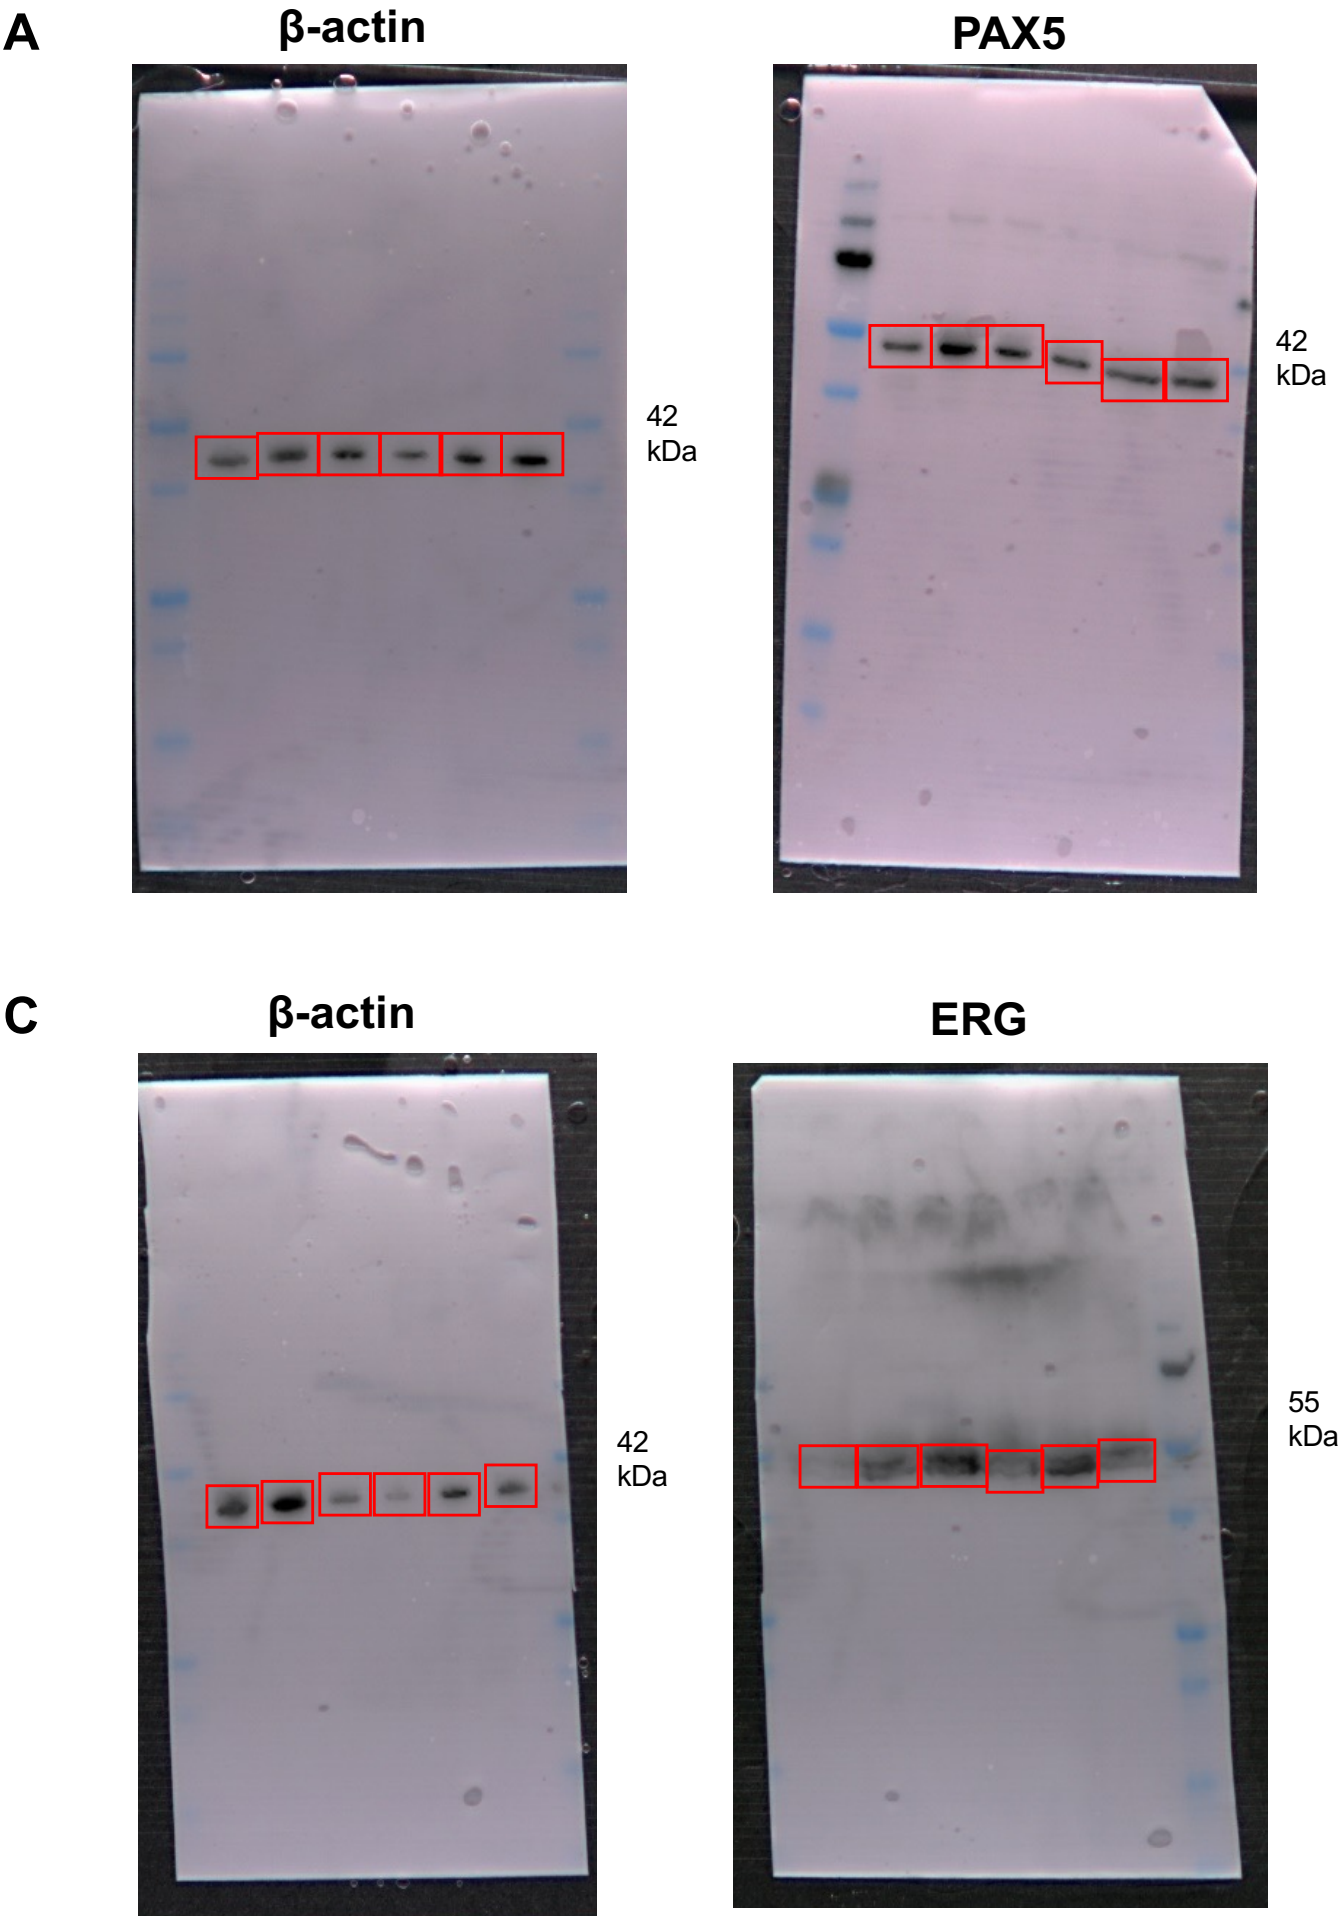

Supplement: fig4-figsupp1-data1 [file Figure4-FigureSupplement1-source data 1.pdf › Figure4-figure supplement 1-source data 1/Figure4-FigureSupplement1-source data 1.pdf]
